# Supplementary material for: Single amino acid residue mediates reciprocal specificity in two mosquito odorant receptors
Source: eLife. 2022 Dec 13;11:e82922. doi: 10.7554/eLife.82922 (PMC9799979; doi:10.7554/eLife.82922)
Supplement: Figure 1—source data 1. [file elife-82922-fig1-data1.xlsx]

## Sheet: Figure 1
Figure 1A		CquiOR10
	Skatole							Indole
-6	97	84	110	80				15	6	15	3
-5	181	198	422	235				20	19	25	20
-4	545	652	830	870				141	87	145	122
Figure 1B		CquiOR2
	Skatole							Indole
-6	0	0	2	18	10			0.5	16	25	192	62
-5	20	4	10	56	45			218	37	79	375	178
-4	78	22	60	255	107			220	80	219	520	285
