# Supplementary material for: Single amino acid residue mediates reciprocal specificity in two mosquito odorant receptors
Source: eLife. 2022 Dec 13;11:e82922. doi: 10.7554/eLife.82922 (PMC9799979; doi:10.7554/eLife.82922)
Supplement: Figure 3—source data 1. [file elife-82922-fig3-data1.xlsx]

## Sheet: Figure 2A
M2,M7
	Indole								Skatole
-6	9.5	8	16.5	4	16	11	12		1	2	4	2	3	3	3
-5	21	20	19	8	70	20	25		2	4	9	6	3	8.5	13
-4	43	30	38	33	75	40	40		6	12	16	8	18	30	20

## Sheet: Figure 2B
M2,5,5,7
	Indole							Skatole
-6	0	2	5	3				0	1	1	1
-5	20	10	10	15				3	10	1	1
-4	127	110	141	150				33	15	18	21

## Sheet: Figure 2C
M2,5,6,7_Outer
	Indole						Skatole
-6	20	20	-4	18	23		14	17	20	18	16
-5	20	22	20	25	25		15	18	20	20	17
-4	420	420	320	315	460		130	70	65	135	134

## Sheet: Figure 2D
M2,5,6,7_Mid;Inner
	Indole						Skatole
-6	0	1	0	3	2		4	2		3	1
-5	3	3	20	25	10		27	100	30	39	41
-4	8	15	40	33	33		405	350	430	180	428

## Sheet: Figure 2E
M2,5,6,7_Inner
	Indole						Skatole
-6	0	0	13	1			2	3	5
-5	5	10	23	13			5	28	47	160
-4	20	60	25	40			174	217	367	253

## Sheet: Figure 2F
M2,5,6,7T78I
	Indole						Skatole
-6	0	2	5				1	1	0
-5	20	30	33				7	10	11
-4	215	222	274				55	27	40

## Sheet: Figure 2G
M2,5,6,7L73A
	Indole										Skatole
-6	0	5	7		10	40	45	10	2		7	12	3		2	50	50	32	10
-5	7	5	10	5	35	50	65	20	5		77	30	20	35	5	100	95	70	35
-4	145	60	27	50	485	85	220	220	13		550	200	300	555	13	580	945	655	485

## Sheet: Figure 2H
M7A73L
	Indole							Skatole
-6	0	0	0	0	5	0		0	2	0	0	0	0
-5	10	39	10	68	7	68		2	7	0	2	0	2
-4	75	98	190	150	29	150		9	10	3	21	5	21

## Sheet: Figure2I
OR10A73L
	Indole							Skatole
-6	0	0	0	0	0	5		0	0	0	0	0	0
-5	68	10	10	39	2	7		2	0	2	0	0	2
-4	150	190	38	98	36	29		21	3	2	10	9	5

## Sheet: Figure 2J
OR2L74A
	Indole						Skatole
-6	0	0	40	8	0		120	22	60	38	180
-5	19	10		20	25		250	175	222	132	270
-4	41	20	60	100	65		140	163	335	260	325
