# Supplementary material for: Single amino acid residue mediates reciprocal specificity in two mosquito odorant receptors
Source: eLife. 2022 Dec 13;11:e82922. doi: 10.7554/eLife.82922 (PMC9799979; doi:10.7554/eLife.82922)
Supplement: Figure 5—source data 1. [file elife-82922-fig5-data1.xlsx]

## Sheet: Figure 5A
Phenol					3,5-Dimethylphenol
CquiOR10	CquiOR2	CquiOR10A73L	CquiOR2L74A		CquiOR10	CquiOR2	CquiOR10A73L	CquiOR2L74A
10	7	7.5	10		60	0	1	18
17	11	14	10		45	4	0	20
20	13	17	12		50	1	1	55
30	7.5	8	12			0	3	55
			15					25

## Sheet: Figure 5B
CquiOR10
1-Methylindole	2-Methylindole	4-Methyindole	5-MethylIndole	6-Methylindole	7-Methylindole
115	20	28	180	21	45
320	215	72	465	120	85
800	240	280	1050	445	245
950	270	315	830	220	200
880	115	80	525	357	40
310	36	30	310	140	70
322	55	30	268	118	50
170	32	26	255	112	43
110	40	20	240	120	22
710	45	10		80	20
290	65	31		140	35

## Sheet: Figure 5C
CquiOR2
1-Methylindole	2-Methylindole	4-Methyindole	5-MethylIndole	6-Methylindole	7-Methylindole
70	62	170	70	104	94
28	35	48	10	43	24
9	20	27	9	25	6.5
7.5	22	32	12	22.5	19.5
25	64	42	40	51.5	57
2	15	27	8	17	1

## Sheet: Figure 5D
CquiOR2L74A
1-Methylindole	2-Methylindole	4-Methyindole	5-MethylIndole	6-Methylindole	7-Methylindole
39	12	20	45	20	22
92	15	28	96	38	32
38	11	20	45	19	24
38	12	12	33	18	3
40	20	50	89	13	22
55	28	30	38	17	20
22	10	5	28.5	8	12.5
24	6	10	28	12	10
78	20	30	70	25	27
29	1.5	5	30	10	2
