# Supplementary material for: Single amino acid residue mediates reciprocal specificity in two mosquito odorant receptors
Source: eLife. 2022 Dec 13;11:e82922. doi: 10.7554/eLife.82922 (PMC9799979; doi:10.7554/eLife.82922)
Supplement: Figure 9—source data 1. [file elife-82922-fig9-data1.xlsx]

## Sheet: Figure 8
Dose	CquiOR10WT
-6	38	10	25	20
-5	198	125	185	120
-4	201	155	275	187
	CquiOR10A73G
-6	25	15	2	5	70	9	35	45	14	60
-5	89	141	145	120	620	180	180	355	130	170
-4	102	195	535	160	1120	395	225	450	180	750
	CquiOR2WT
-6	1	0	0	5	2	21
-5	5	2	0	9	8	25
-4	5	3	0	11	12	25
	CquiOR10A73L
-6	4	0	2	0
-5	0	0	0	0
-4	2	1	8	1
	CquiOR2L74A
-6	10	12	20	38
-5	70	110	150	180
-4	56	130	120	155
	CquiOR2L74G
-6	0	0	5	5	3	2	2	15	47	38
-5	16	25	27	40	28	56	180	165	150	55
-4	17	36	52	144	107	80	440	330	275	25
	CquiOR2L74I
-6	0	0	3	0	2
-5	0	0	22	0	3
-4	0	0	35	3	8
